# Supplementary material for: Complexation-driven ion-exchange polymer inclusion membranes for separation of cobalt and nickel ions from lithium-ion via proton pumping
Source: Royal Society of Chemistry journal article supplement (doi:10.1039/d4su00061g), 2024-01-01
Supplement: d4su00061g8.pdf [file d4su00061g8.pdf]

## Supporting Information

### Complexation-Driven Ion-Exchange Polymer Inclusion Membranes for Separation of Cobalt and Nickel ions from Lithium ion via Proton Pumping

Babafemi Adigun<sup>a, b</sup>, Bishnu P. Thapaliya<sup>c\*</sup>, Huimin Luo<sup>d\*</sup>, Sheng Dai<sup>a, b, c\*</sup>

<sup>a</sup> Department of Chemistry, The University of Tennessee, Knoxville, Tennessee 37996, United States

<sup>b</sup> Institute of Advanced Materials & Manufacturing, Knoxville, Tennessee 37920, United States

<sup>c</sup> Chemical Sciences Division, Oak Ridge National Laboratory, Oak Ridge, Tennessee 37831, United States

Email: [prasadthapab@ornl.gov](mailto:prasadthapab@ornl.gov), [dais@ornl.gov](mailto:dais@ornl.gov)

<sup>d</sup> Manufacturing Science Division, Oak Ridge National Laboratory, Oak Ridge, Tennessee 37831, United States

Email: [luoh@ornl.gov](mailto:luoh@ornl.gov)

**KEYWORDS:** *Ion-Exchange Polymer Inclusion Membrane (IEPIM), ionic liquids, membrane separation, membrane stability.*

## Synthesis of Ionic Liquids

Ionic liquid 1-Octyl-3-methylimidazolium bis(trifluoromethanesulfonimide) (OMIm-NTf<sub>2</sub>) was synthesized by modified procedure from the literature.<sup>1</sup>

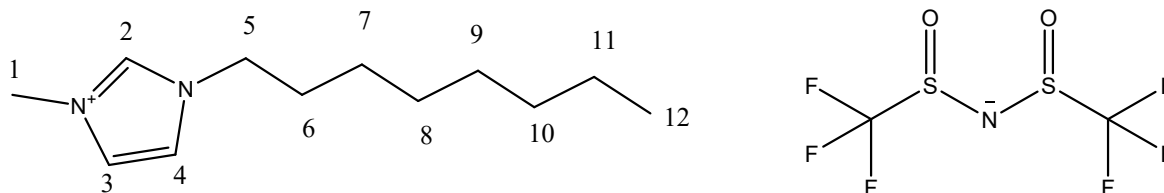

<sup>1</sup>H NMR (400 MHz, DMSO-D<sub>6</sub>)  $\delta$  9.38 – 8.91 (s, 1H, H<sub>2</sub>), 7.72 (d, J = 1.9 Hz, 1H, H<sub>4</sub>), 7.65 (d, J = 1.7 Hz, 1H, H<sub>3</sub>), 4.19 – 4.04 (t, J = 7.2 Hz, 2H, H<sub>5</sub>), 3.80 (s, 3H, H<sub>1</sub>), 1.92 – 1.51 (m, J = 7.2 Hz, 2H, H<sub>6</sub>), 1.42 – 0.92 (m, J = 8.8 Hz, 10H, H<sub>11</sub>, H<sub>10</sub>, H<sub>9</sub>, H<sub>8</sub>, H<sub>7</sub>), 0.87 – 0.46 (t, J = 6.7 Hz, 3H, H<sub>12</sub>).

<sup>13</sup>C NMR (101 MHz, DMSO-D<sub>6</sub>)  $\delta$  137.02 (C<sub>2</sub>), 124.14 (C<sub>4</sub>), 122.79 (C<sub>3</sub>), 120.02 (q, J = 322.0 Hz) (CF<sub>3</sub>), 49.30 (C<sub>5</sub>), 36.25 (C<sub>1</sub>), 31.68 (C<sub>6</sub>), 29.90 (C<sub>7</sub>), 29.00 (C<sub>8</sub>), 28.85 (C<sub>9</sub>), 26.01 (C<sub>10</sub>), 22.58 (C<sub>11</sub>), 14.43 (C<sub>12</sub>).

## Membrane Characterization

Infrared (IR) spectroscopy was conducted on a Nicolet IS50 FT-IR (ATR) spectrometer in the range of 4000-500 cm<sup>-1</sup>. The surface morphology of the IEPIM and PVDF-HFP was investigated on a Zeiss Auriga Crossbeam scanning electron microscopy (SEM).

## FTIR Spectra of Cyanex 301

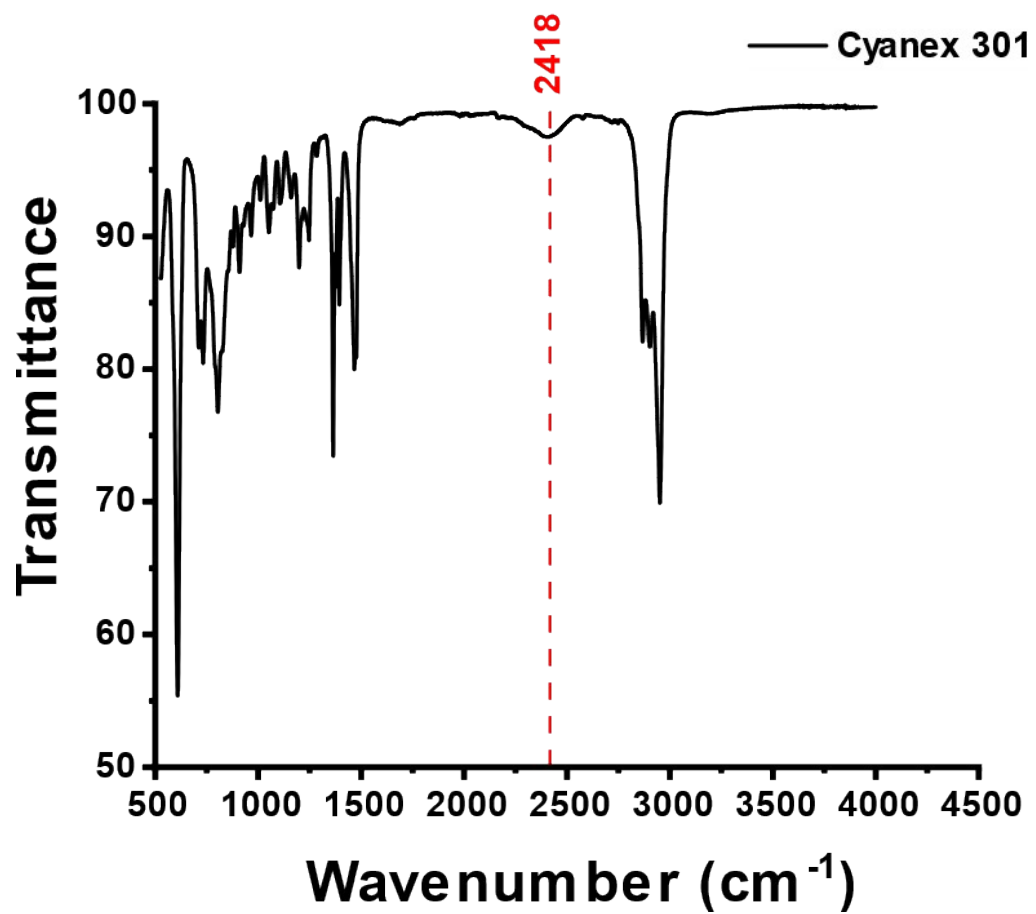

**Figure S1:** FTIR Spectra of Cyanex 301 showing the peak corresponding to S—H stretching bonds.

Transport of  $\text{Co}^{2+}$ ,  $\text{Ni}^{2+}$  and  $\text{Li}^+$  across IEPIM at different weight compositions.

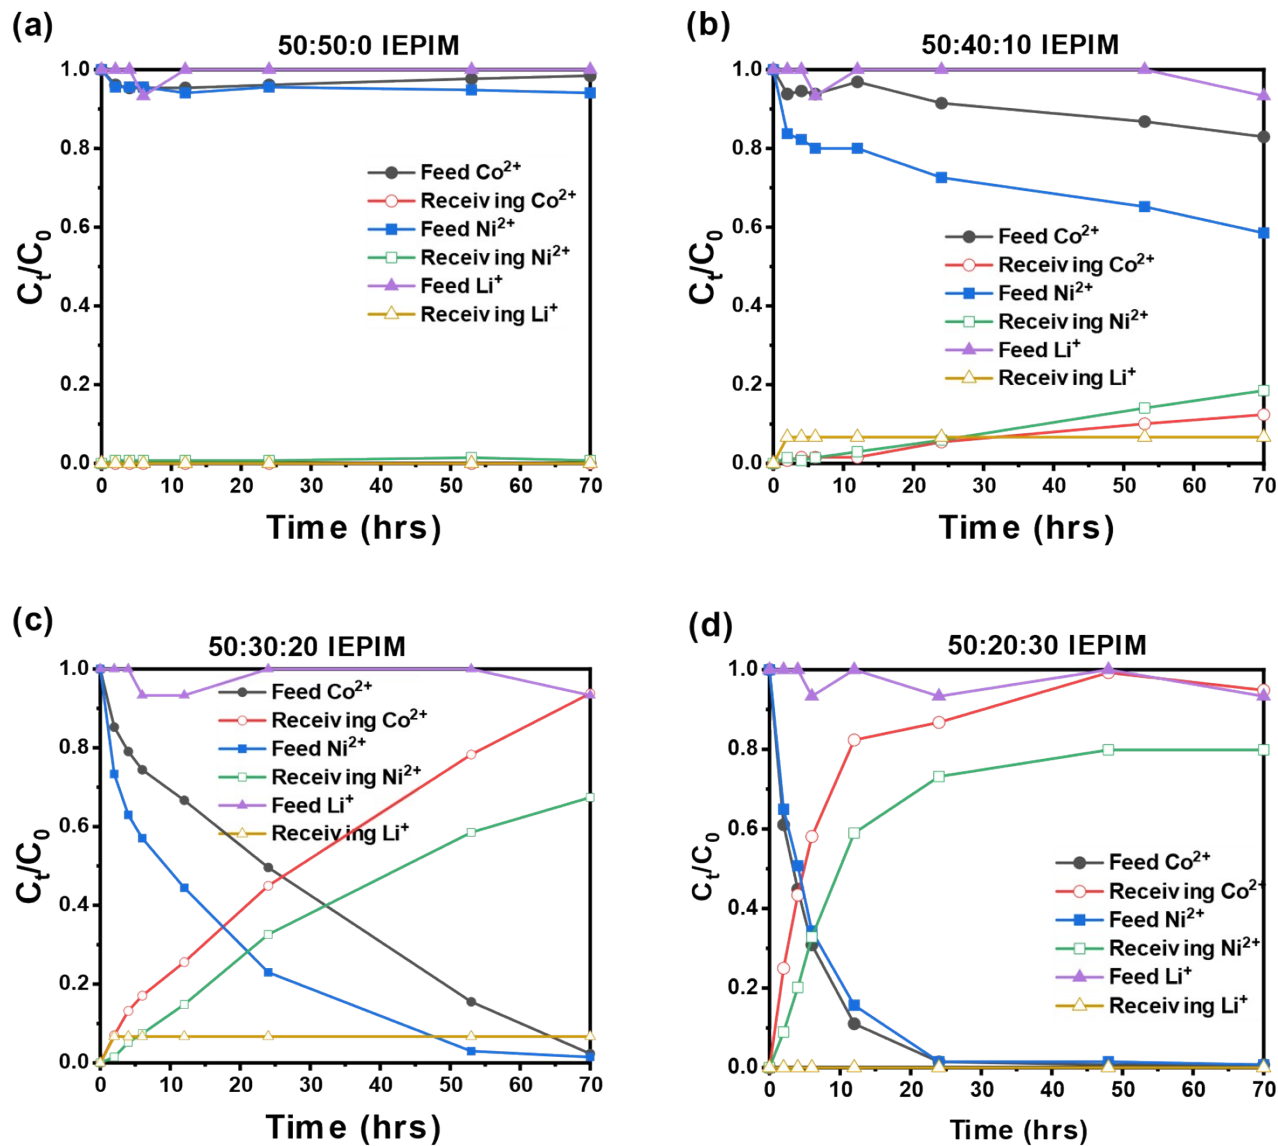

**Figure S2:**  $\text{Co}^{2+}$ ,  $\text{Ni}^{2+}$  and  $\text{Li}^+$  transport across IEPIM at varying weight percent composition (a) 0% wt. composition (b) 10% wt. composition (c) 20% wt. composition and (d) 30% wt. composition.

## Effect of Membrane Thickness on Transport of ions

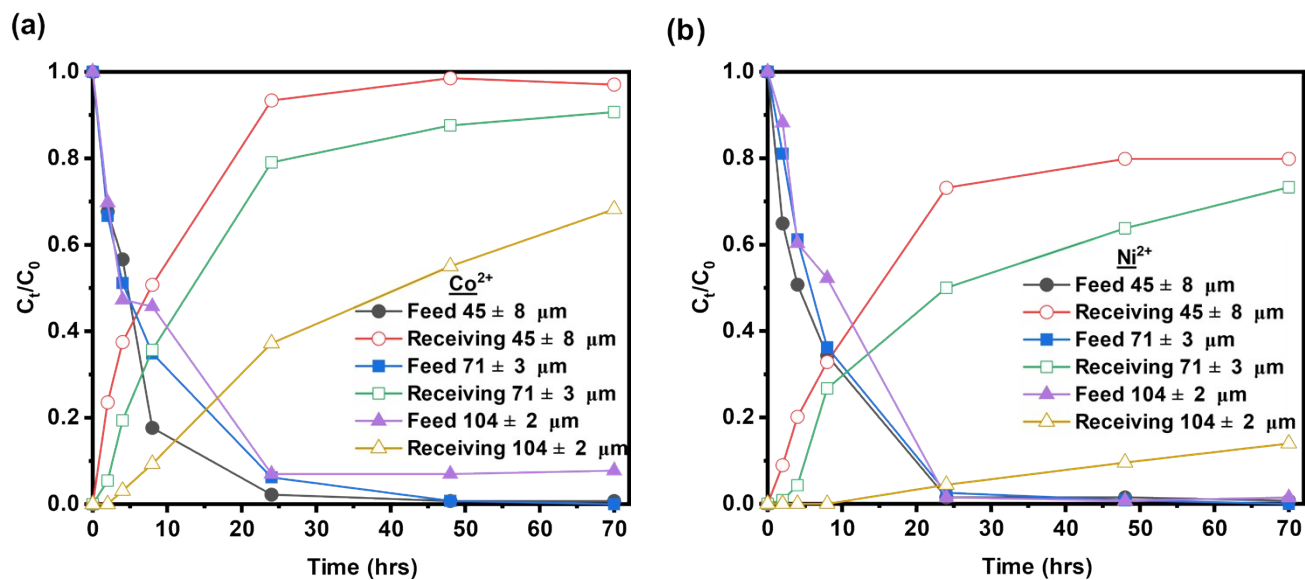

**Figure S3:** (a) Transport of  $\text{Co}^{2+}$  (b) Transport of  $\text{Ni}^{2+}$  across an IEPIM at different thickness.

The concentration of the feed solution decreased over time, showing that IEPIM was able to extract  $\text{Co}^{2+}$  and  $\text{Ni}^{2+}$  from the feed solution.

## Stability of IEPIM for Transport of $\text{Co}^{2+}$ and $\text{Ni}^{2+}$

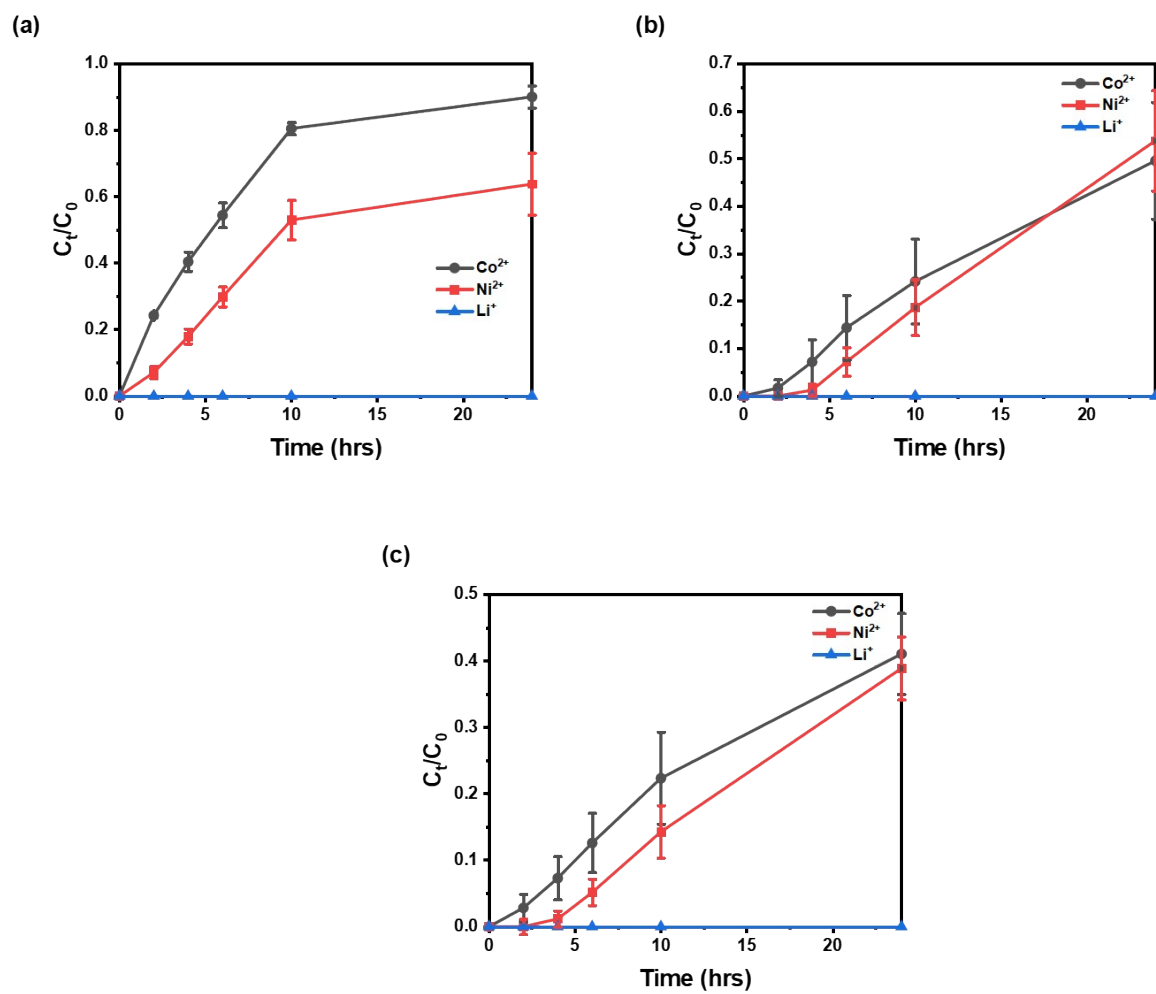

**Figure S4:** Transport of  $\text{Co}^{2+}$ ,  $\text{Ni}^{2+}$  and  $\text{Li}^{+}$  after 24 hours across IEPIM for three cycles: (a) 1<sup>st</sup> cycle, (b) 2<sup>nd</sup> cycle, (c) 3<sup>rd</sup> cycle.

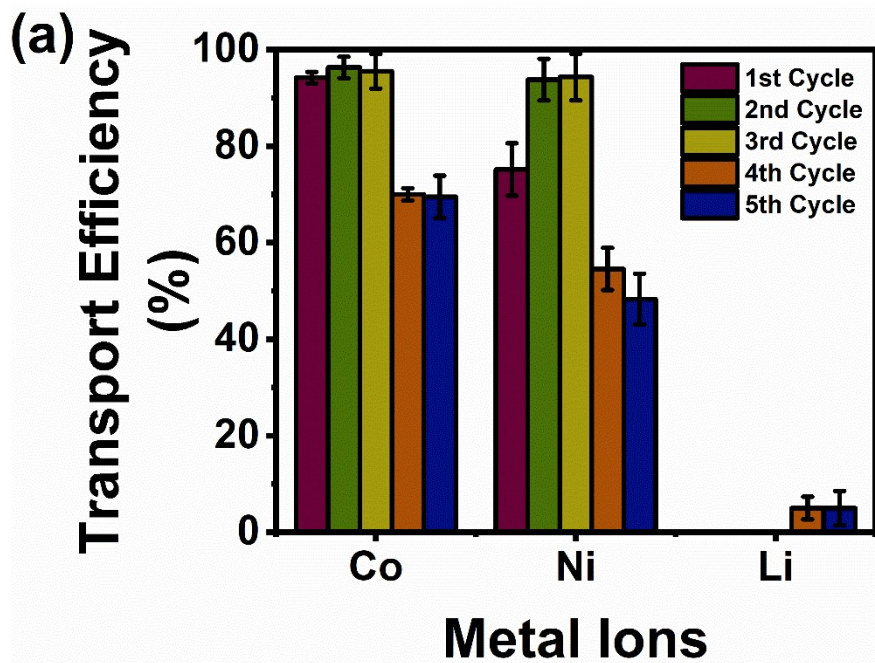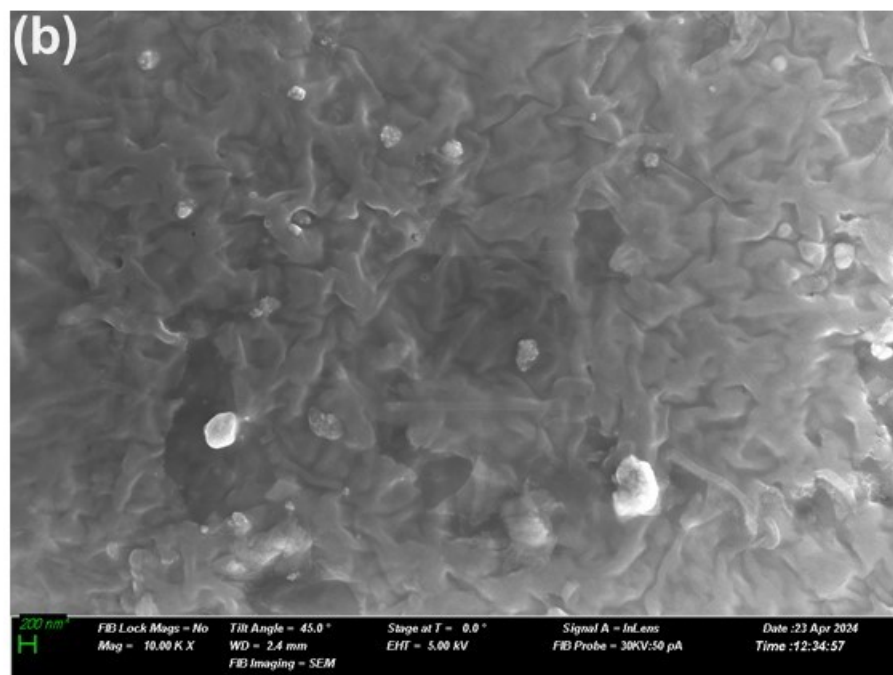

**Figure S5:** (a) Transport efficiency of 5 transport cycles. Feed solution: 100 mL of 0.1 mM  $\text{Li}^+$ ,  $\text{Co}^{2+}$ , and  $\text{Ni}^{2+}$ . Receiving Solution: 2M HCl. (b) SEM image of the IEPIM after 5 transport cycles.

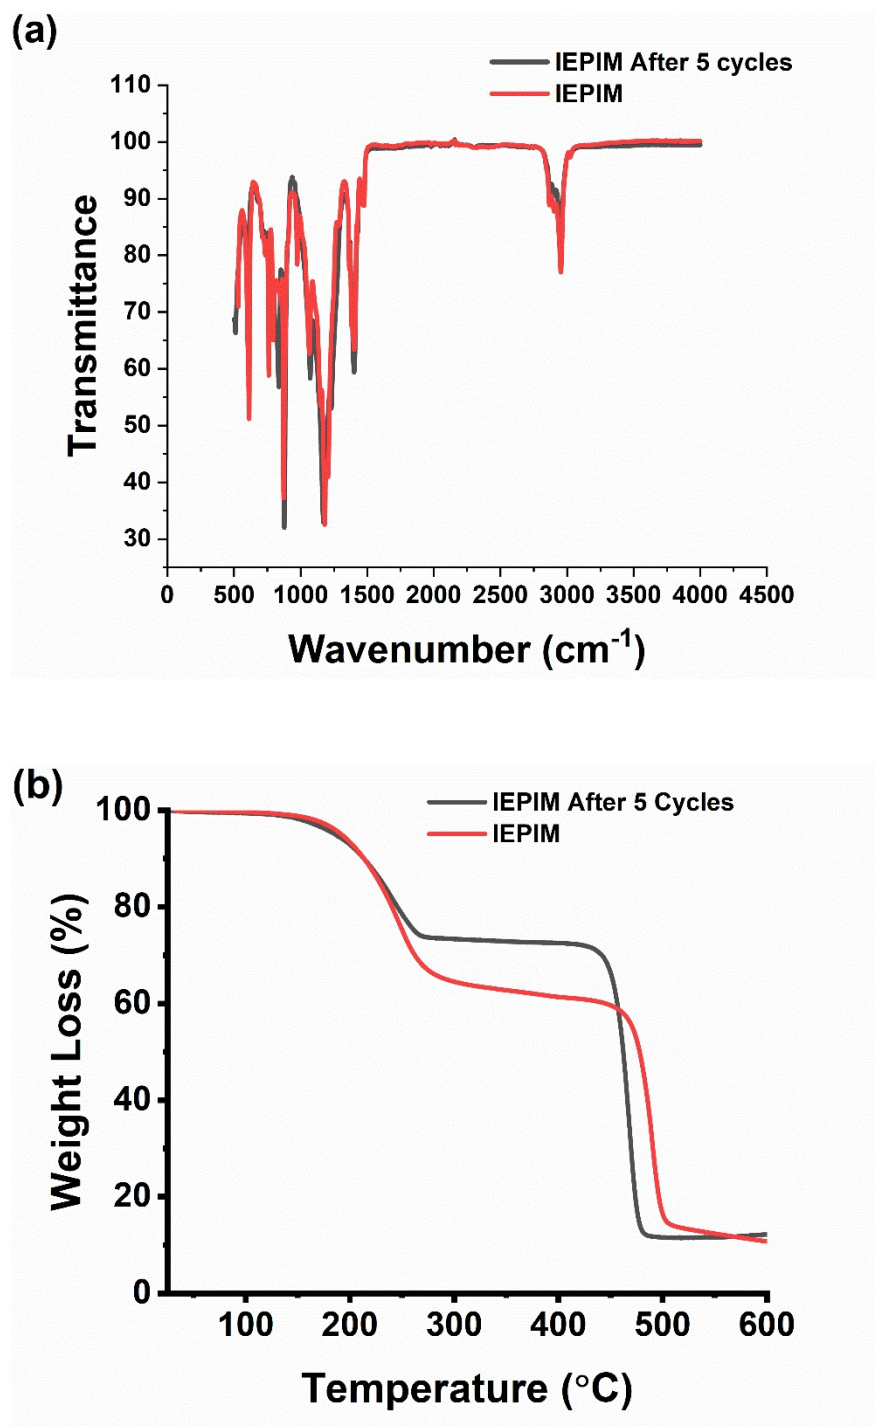

**Figure S6:** (a) FTIR (b) TGA of IEPIM after 5 transport cycle of experiments under  $\text{N}_2$  at a scan rate of  $10^{\circ}\text{C}/\text{min}$



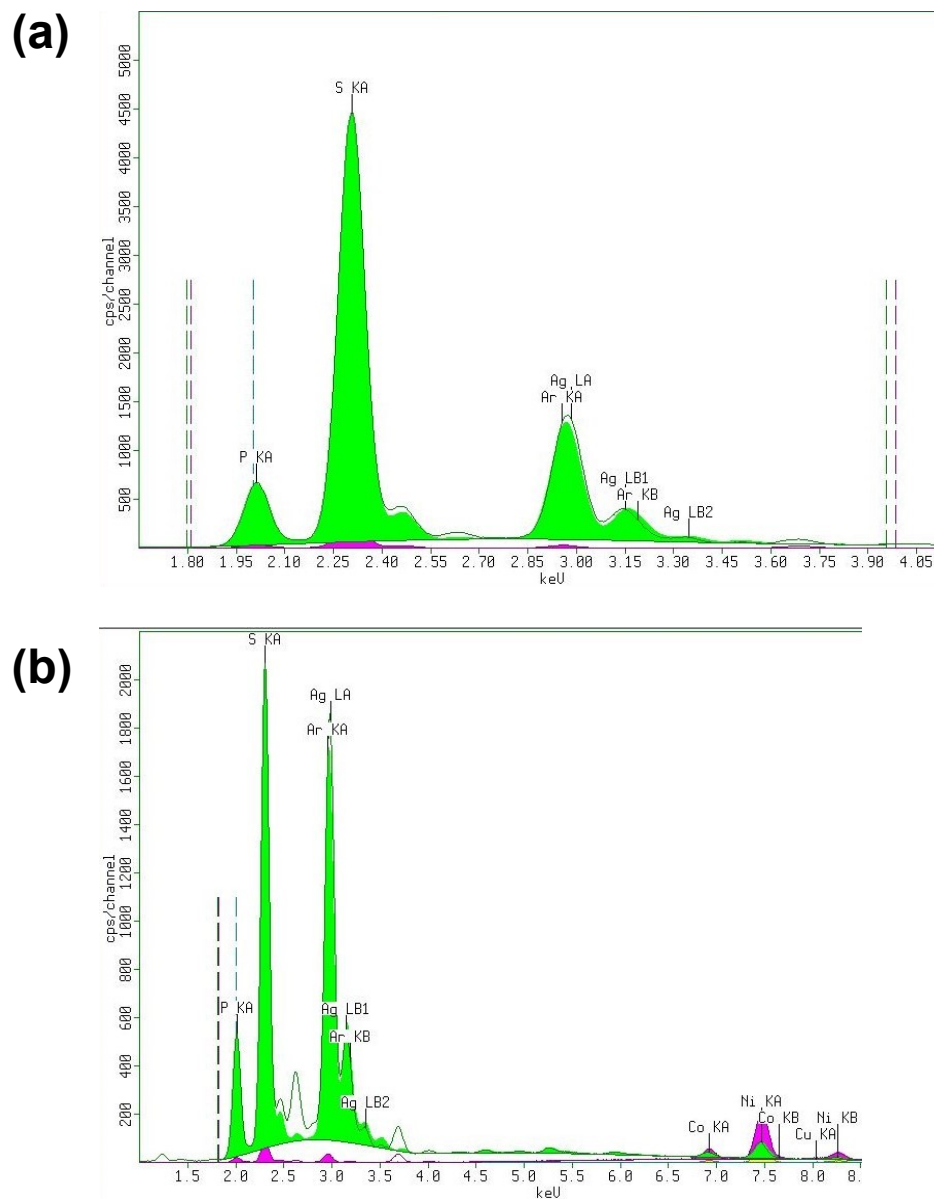

**Figure S7:** EDXRF spectra of the IEPIM (a) before transport experiment (b) after 5 cycles of experiment showing the presence of cobalt and nickel in the membrane.

## REFERENCES

- (1) Bonhote, P.; Dias, A.-P.; Papageorgiou, N.; Kalyanasundaram, K.; Grätzel, M. Hydrophobic, highly conductive ambient-temperature molten salts. *Inorganic chemistry* **1996**, *35* (5), 1168-1178.
