# Supplementary figures and images for: Complexation-driven ion-exchange polymer inclusion membranes for separation of cobalt and nickel ions from lithium-ion via proton pumping
Source: Royal Society of Chemistry journal article supplement (doi:10.1039/d4su00061g), 2024-01-01

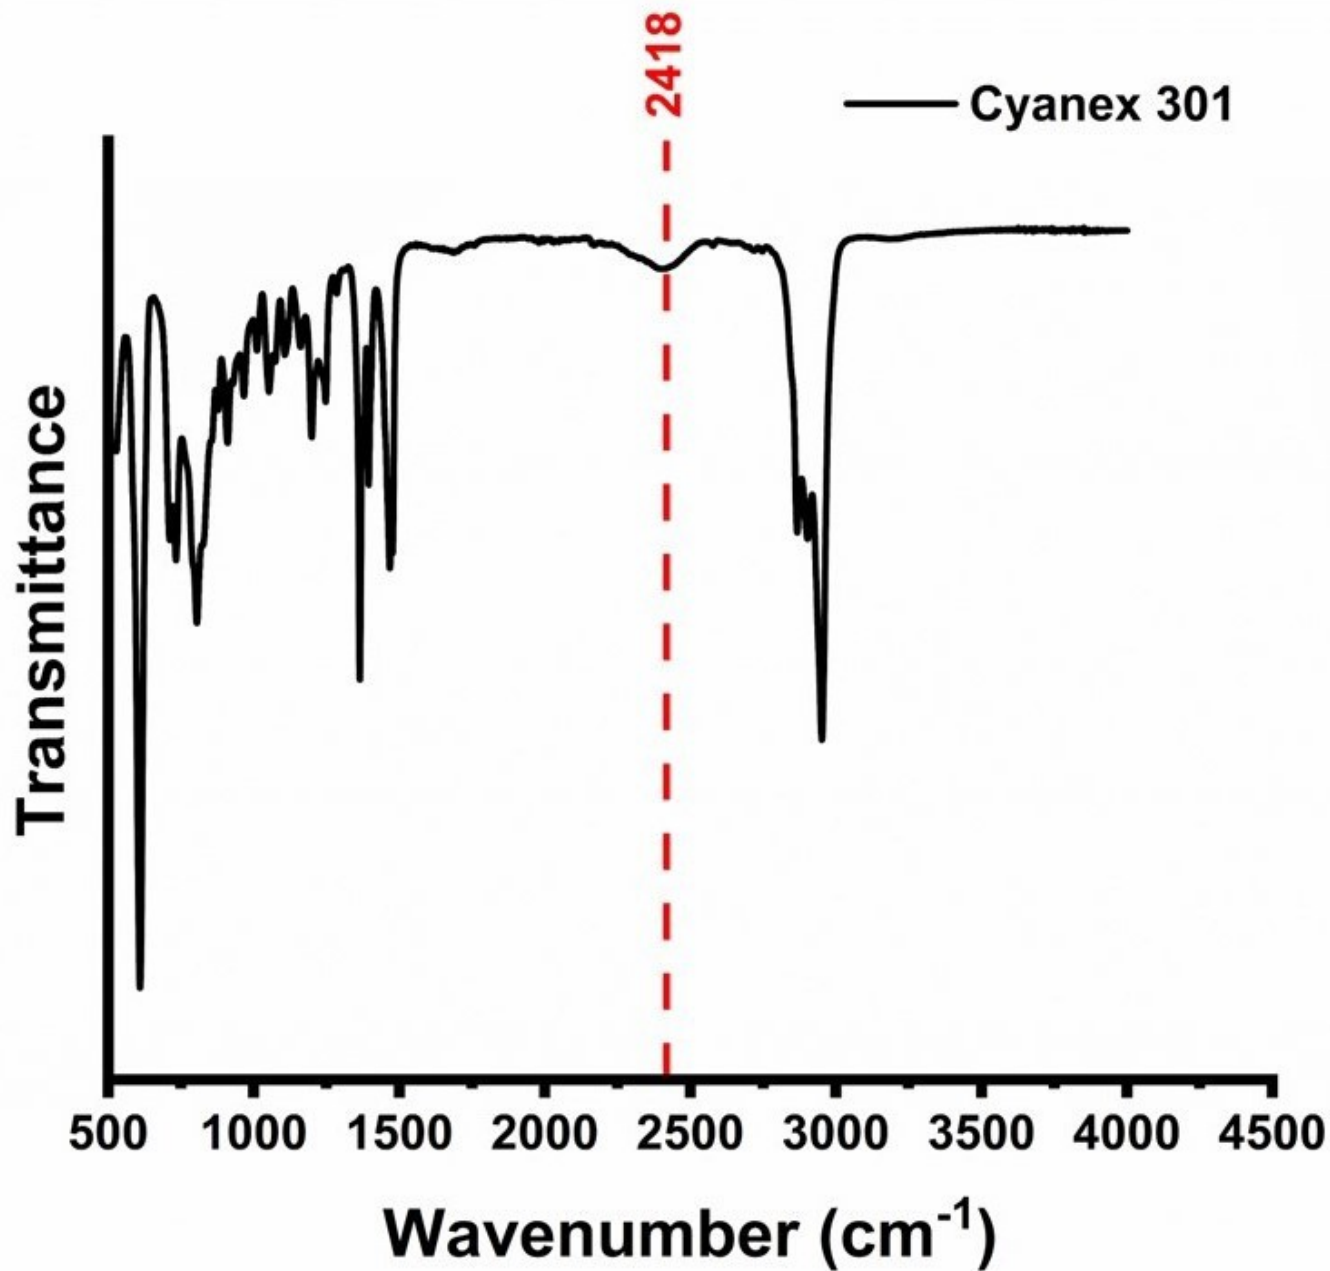

Supplement: d4su00061g1.pdf [file d4su00061g1.pdf]

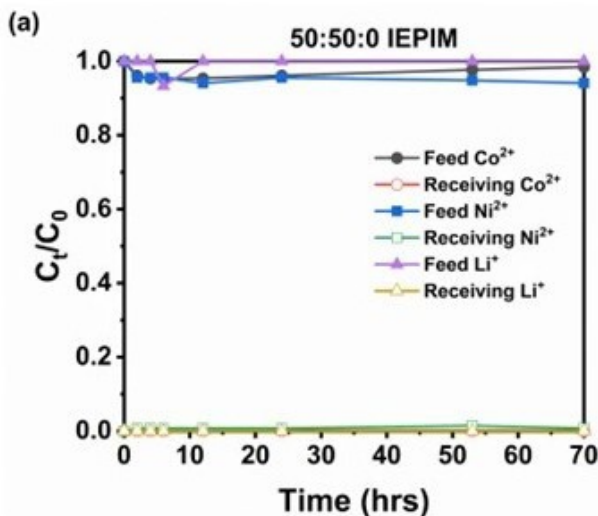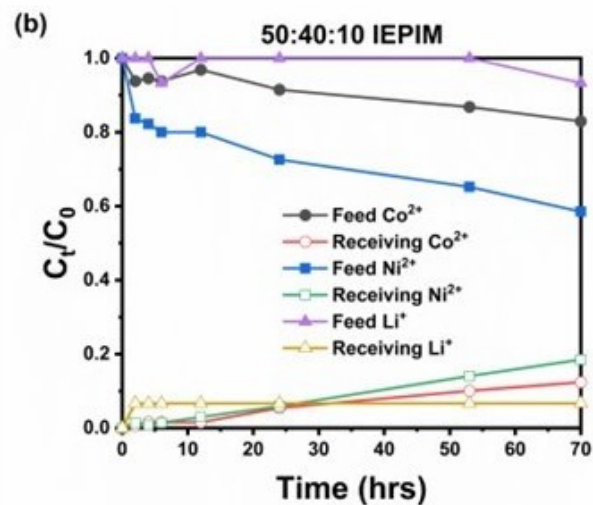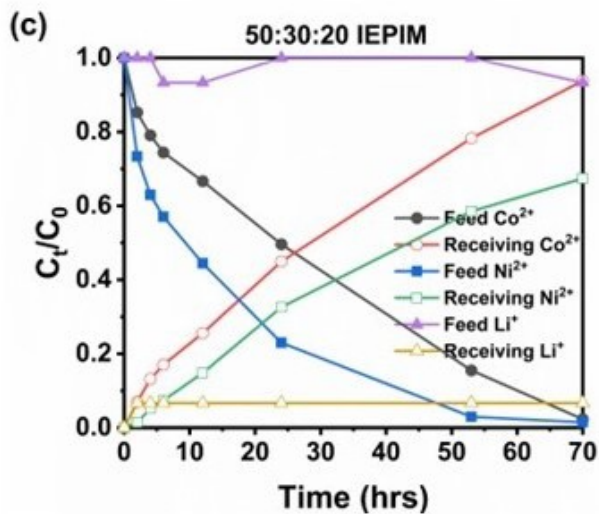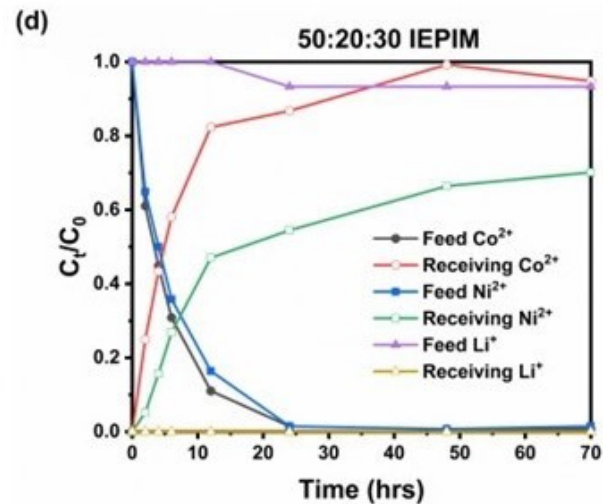

Supplement: d4su00061g2.pdf [file d4su00061g2.pdf]

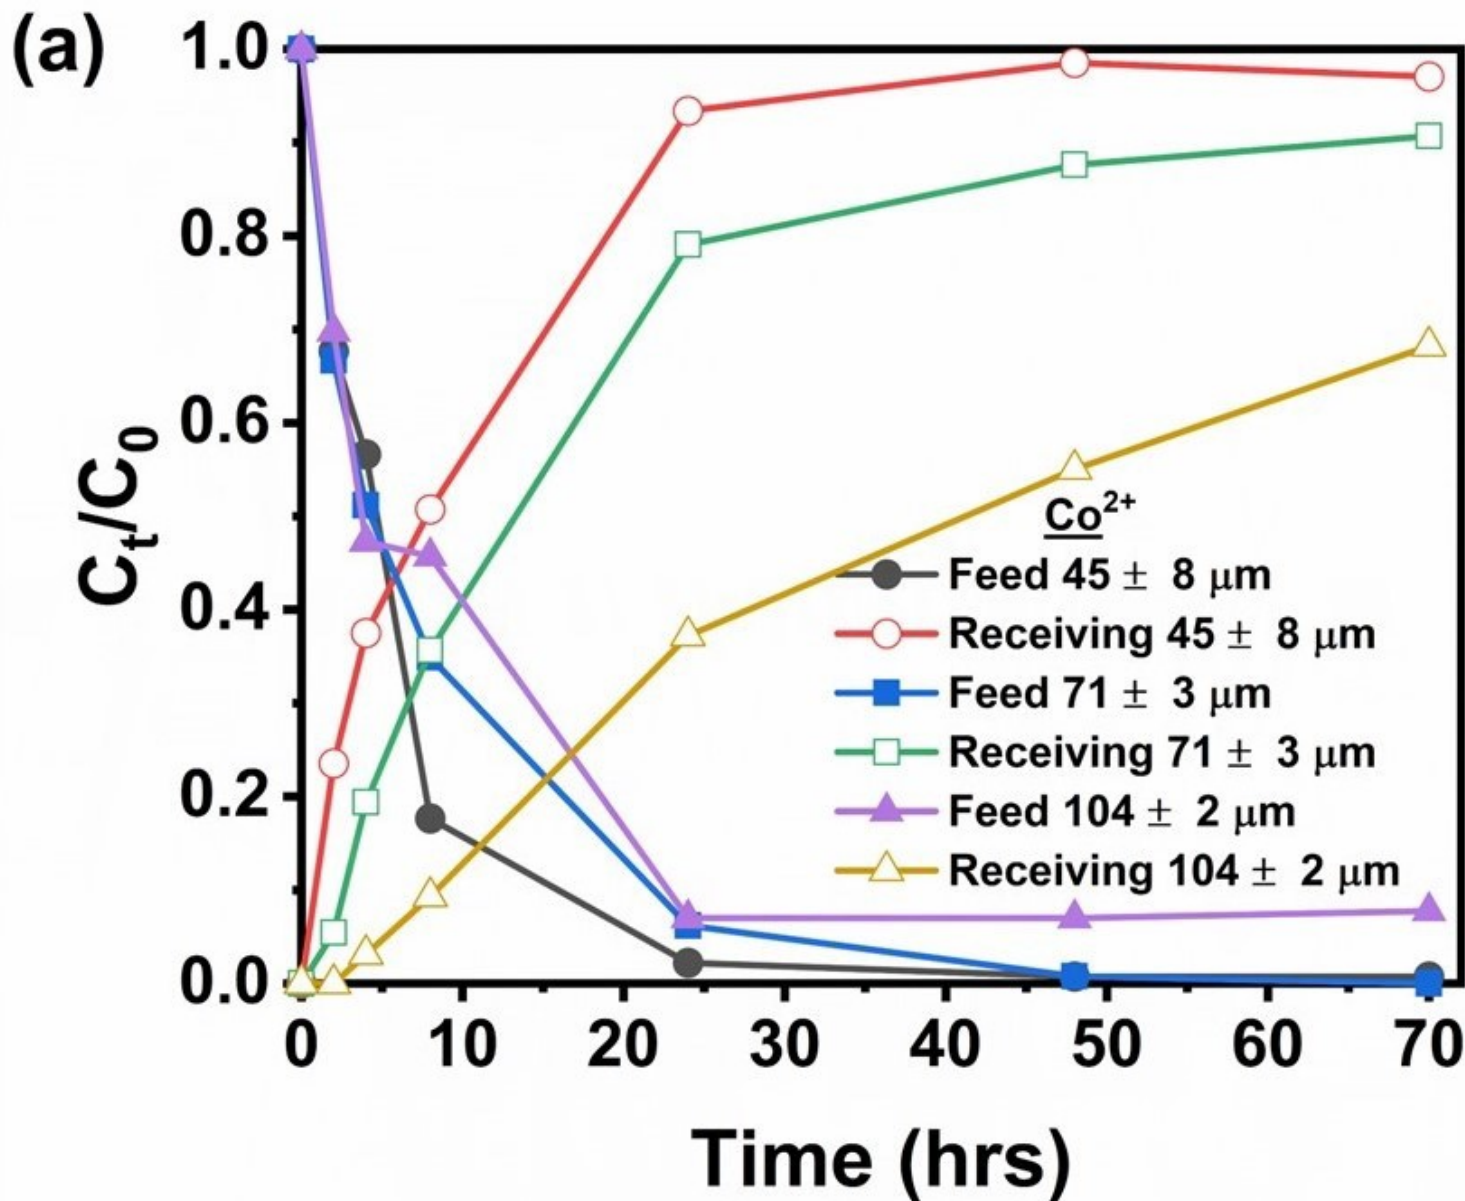

Supplement: d4su00061g3.pdf [file d4su00061g3.pdf]

(a)

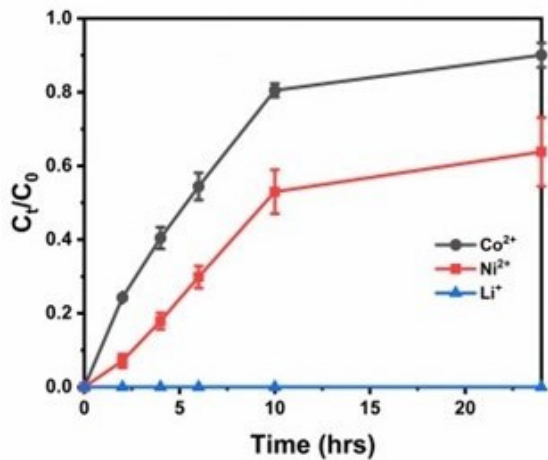

(b)

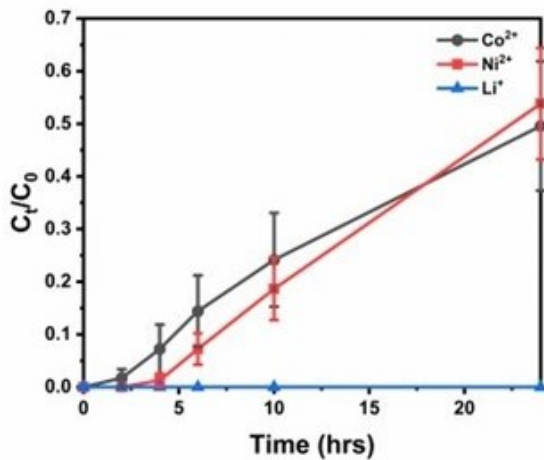

(c)

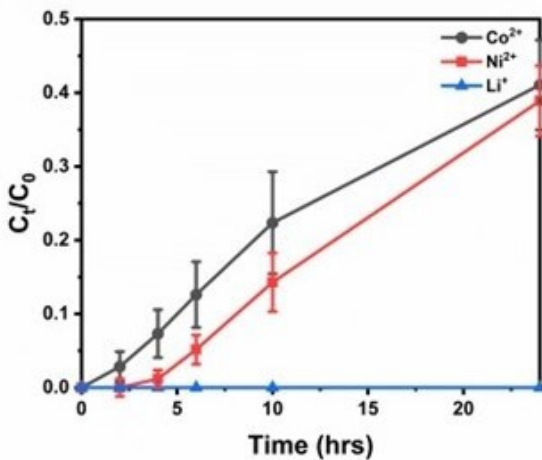

Supplement: d4su00061g4.pdf [file d4su00061g4.pdf]

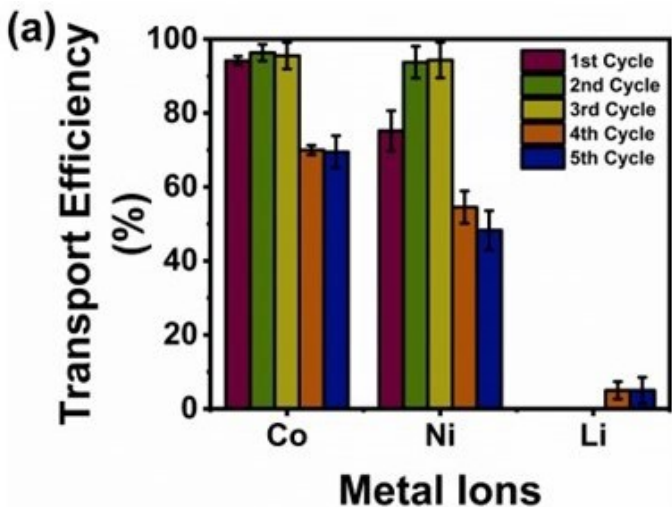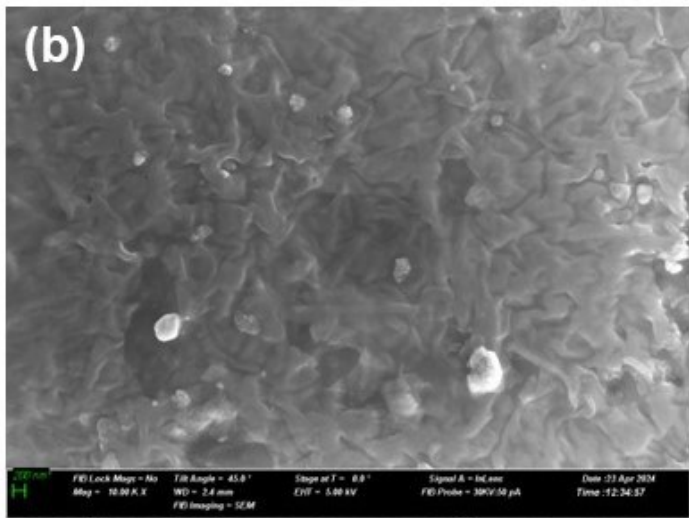

Supplement: d4su00061g5.pdf [file d4su00061g5.pdf]

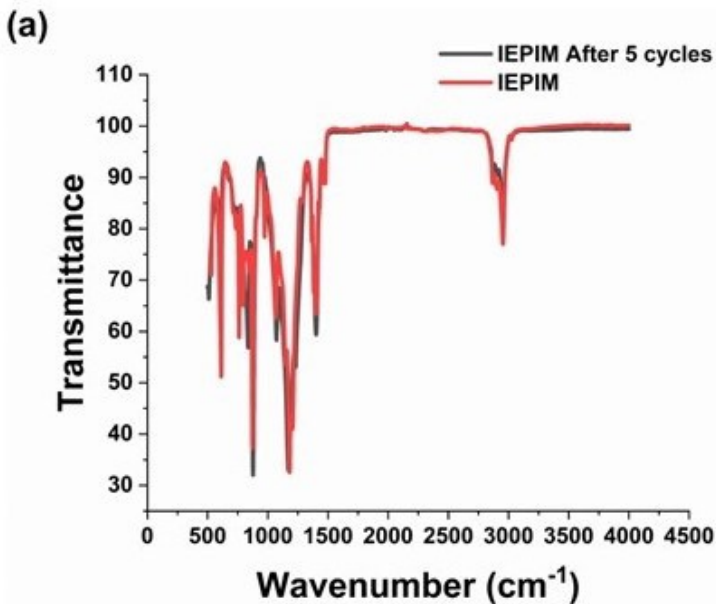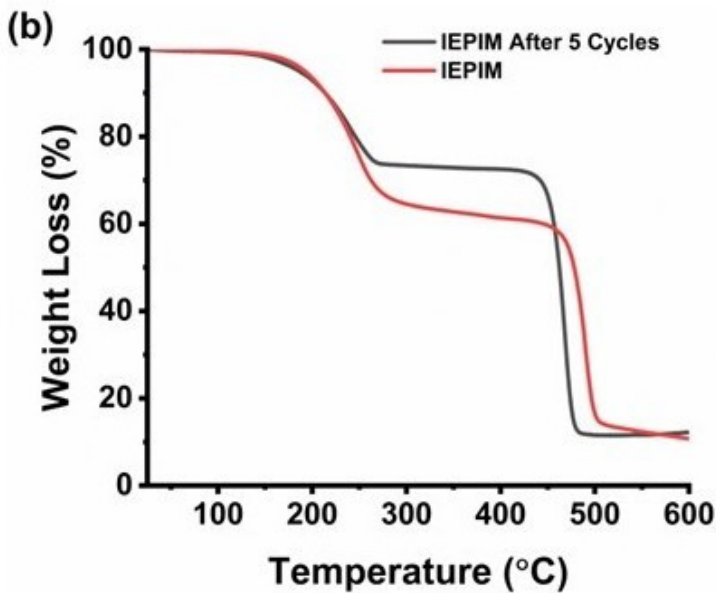

Supplement: d4su00061g6.pdf [file d4su00061g6.pdf]

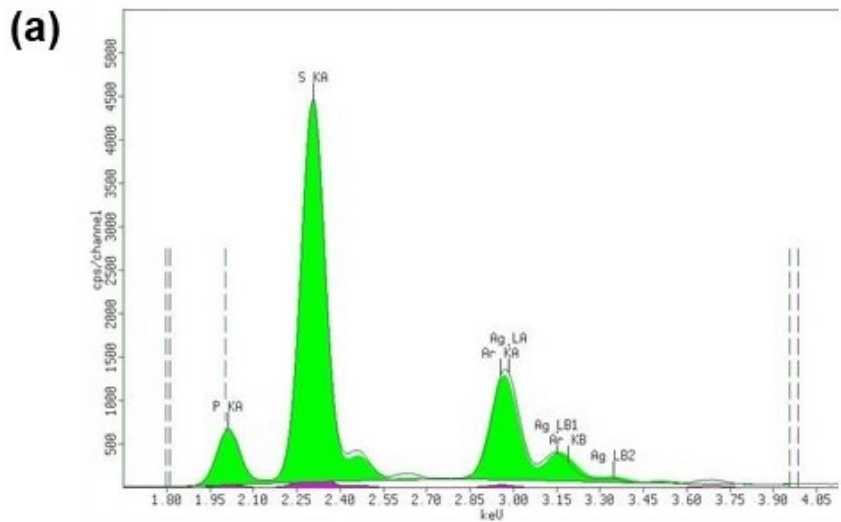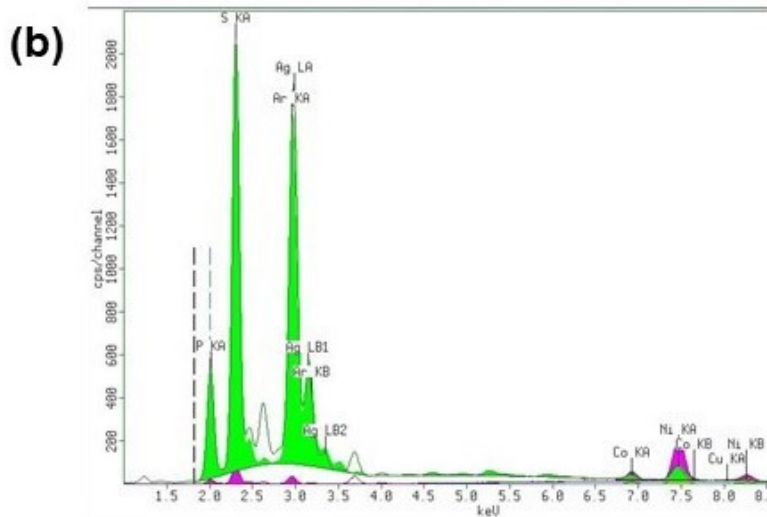

Supplement: d4su00061g7.pdf [file d4su00061g7.pdf]
